# Supplementary material
Source: publisher figshare collection journal article supplement (https://gsajournals.figshare.com/ndownloader/files/21518922)
Supplement: Supplementary file 1 [file 21518922]

**Table S3.** The target transcripts of lncRNAs

| LncRNA_ID | Target_mRNA_ID |
| --- | --- |
| F02.PB19082 | F02.PB42362;F02.PB3697;F01.PB1811;F01.PB16505;F01.PB805;F01.PB4552;F01.PB3336;F02.PB925 |
| F01.PB44923 | F01.PB41039;F02.PB16497;F02.PB4568;F01.PB5786;F02.PB4999;F02.PB16138;F02.PB13141;F02.PB11665;F02.PB6274;F02.PB2096;F02.PB13991;  F02.PB2293;F02.PB7416;F01.PB13615;F01.PB3021;F02.PB12542 |
| F02.PB4479 | F01.PB41763;F01.PB23900 |
| F02.PB7442 | F02.PB46496 |
| F02.PB2258 | F02.PB40833;F02.PB36518 |
| F01.PB11361 | F02.PB48498;F02.PB30275 |
| F01.PB42416 | F02.PB46051;F02.PB26095;F01.PB29761;F01.PB22564 |
| F01.PB4179 | F01.PB40241;F01.PB22193;F01.PB41189 |
| F01.PB40619 | F01.PB15597;F01.PB7628;F02.PB6282 |
| F02.PB2203 | F01.PB26825;F01.PB28399;F01.PB19768;F01.PB18090;F02.PB10442;F01.PB17102 |
| F01.PB40008 | F01.PB46031 |
| F02.PB6701 | F02.PB48498;F02.PB30275 |
| F02.PB18534 | F02.PB12982 |
| F02.PB1813 | F01.PB40345 |
| F01.PB18370 | F02.PB48391;F02.PB47418;F01.PB44372;F01.PB33181 |
| F01.PB32135 | F01.PB3938;F02.PB478;F02.PB4088;F01.PB10708;F01.PB3482 |
| F01.PB45400 | F01.PB10481;F02.PB9830;F01.PB40989;F01.PB6434;F02.PB9104;F01.PB17111 |
| F01.PB42695 | F02.PB5574 |
| F02.PB43590 | F02.PB47124;F02.PB46176;F02.PB48670;F02.PB48059;F02.PB38361;F01.PB37931 |
| F02.PB2467 | F02.PB44762 |
| F02.PB10354 | F02.PB36603;F01.PB2657 |
| F01.PB6505 | F02.PB48854;F01.PB38057 |
| F02.PB6996 | F01.PB2409 |
| F01.PB2028 | F02.PB3026;F02.PB877 |
| F02.PB21920 | F02.PB43031;F02.PB20362 |
| F02.PB33871 | F02.PB24029;F01.PB12032 |
| F01.PB45040 | F01.PB605;F01.PB40486;F02.PB3062;F02.PB1304;F02.PB978;F01.PB39973 |
| F02.PB5538 | F02.PB46579;F02.PB12524 |
| F01.PB39958 | F01.PB4015;F01.PB40271 |
| F01.PB12650 | F01.PB46173;F01.PB44978;F02.PB49039 |
| F01.PB19274 | F02.PB35358 |
| F01.PB2043 | F02.PB48946 |
| F02.PB4172 | F02.PB12982 |
| F02.PB43996 | F02.PB49065;F02.PB43955 |
| F02.PB4158 | F02.PB40833;F02.PB36518 |
| F02.PB14659 | F01.PB14836 |
| F01.PB39810 | F01.PB20059;F02.PB45514;F02.PB41101;F02.PB25149;F02.PB7706;F01.PB20028 |
| F01.PB43564 | F01.PB22331;F01.PB12032;F01.PB32993 |
| F01.PB40090 | F02.PB2987;F02.PB27171 |
| F01.PB10738 | F01.PB12934 |
| F02.PB17478 | F02.PB41881;F01.PB44978;F02.PB49039 |
| F02.PB43157 | F01.PB25172 |
| F01.PB2215 | F02.PB17044;F02.PB9080 |
| F02.PB4481 | F02.PB41881;F01.PB44978;F02.PB49039 |
| F02.PB46427 | F02.PB1060;F02.PB41937;F02.PB1432;F01.PB2456;F01.PB2066;F02.PB3491;F01.PB3552;F01.PB3317 |
| F02.PB1580 | F02.PB49039;F02.PB41881;F01.PB44978 |
| F02.PB18295 | F02.PB46587 |
| F01.PB18145 | F01.PB41337 |
| F02.PB135 | F01.PB46031 |
| F02.PB42493 | F02.PB37286 |
| F02.PB15464 | F01.PB40063 |
| F02.PB37111 | F02.PB48946 |
| F02.PB963 | F02.PB49056 |
| F01.PB2056 | F01.PB16477;F02.PB17648;F02.PB8868 |
| F01.PB4629 | F02.PB3229 |
| F02.PB11706 | F02.PB4809 |
| F02.PB18468 | F02.PB41881;F01.PB44978;F02.PB49039 |
| F02.PB8814 | F01.PB14836 |
| F02.PB1911 | F02.PB49056 |
| F01.PB14009 | F02.PB32767;F02.PB24136;F01.PB36025;F01.PB30807;F01.PB31367;F01.PB27680;F02.PB30304;F01.PB31894;F01.PB37208;F01.PB27552;F01.PB26710;  F02.PB31133;F02.PB49153 |
| F01.PB30117 | F01.PB23233;F01.PB34342;F01.PB30649;F02.PB23962;F01.PB33723 |
| F01.PB5583 | F02.PB46714;F01.PB41522;F01.PB37082;F01.PB19452;F01.PB12623 |
| F02.PB2310 | F02.PB42019;F02.PB15354;F02.PB45185;F02.PB44248;F02.PB12776;F02.PB10846;F02.PB8171;F01.PB27559 |
| F01.PB3287 | F02.PB1325;F01.PB4515;F02.PB3089 |
| F01.PB9893 | F02.PB41881;F01.PB44978;F02.PB49039 |
| F02.PB28583 | F02.PB48946 |
| F01.PB4412 | F01.PB10746;F02.PB1781 |
| F02.PB12156 | F02.PB48946 |
| F02.PB16227 | F02.PB13695;F01.PB43481;F01.PB26742 |
| F01.PB12271 | F02.PB13651;F02.PB16689;F01.PB11162 |
| F01.PB2475 | F02.PB49065 |
| F02.PB42817 | F02.PB49065 |
| F01.PB6940 | F01.PB41414;F01.PB31127;F01.PB25728;F01.PB19478;F02.PB25012;F02.PB24737;F02.PB45337;F02.PB29112;F01.PB25570;F01.PB19406;  F02.PB18360;F02.PB21754 |
| F02.PB15444 | F02.PB6339;F01.PB40693 |
| F02.PB5 | F02.PB46392;F02.PB46683 |
| F02.PB940 | F02.PB46591 |
| F02.PB43174 | F02.PB32374;F02.PB26774;F01.PB44813;F02.PB34548;F02.PB49341;F01.PB36059;F01.PB36055;F02.PB44221;F01.PB20785;F02.PB27062;  F01.PB43191;F01.PB35386;F01.PB30430;F02.PB23177;F01.PB33802;F01.PB25258 |
| F02.PB25869 | F02.PB25266;F01.PB25799;F02.PB25151;F01.PB22286;F02.PB21617;F01.PB19249;F02.PB24959;F01.PB28267;F02.PB45831;F02.PB44945;  F01.PB25493 |
| F01.PB7846 | F02.PB46496 |
| F01.PB11420 | F02.PB48946 |
| F01.PB43211 | F01.PB37301;F02.PB37143;F02.PB37730 |
| F01.PB45604 | F02.PB48946 |
| F02.PB3063 | F01.PB15399 |
| F01.PB41580 | F02.PB43328 |
| F01.PB9239 | F02.PB39125;F02.PB38904;F02.PB37497;F01.PB38402;F01.PB30998;F02.PB40974;F02.PB40730;F02.PB40572;F02.PB39608;F02.PB37410;  F02.PB36712;F02.PB20217;F02.PB36647;F02.PB36017;F02.PB35630;F02.PB38215;F02.PB37829;F02.PB38046;F01.PB38372 |
| F02.PB2595 | F01.PB46411 |
| F02.PB14656 | F02.PB46579 |
| F01.PB1944 | F01.PB12158 |
| F01.PB1709 | F02.PB5661;F01.PB5418;F02.PB15213;F01.PB11898 |
| F01.PB26880 | F01.PB27308 |
| F01.PB10023 | F02.PB27189;F01.PB33755;F01.PB37970;F01.PB29578 |
| F02.PB4846 | F02.PB41881;F01.PB44978;F02.PB49039 |
